# Supplementary material for: Data mining-based machine learning methods for improving hydrological data a case study of salinity field in the Western Arctic Ocean
Source: Copernicus journal article supplement (doi:10.5194/essd-2024-138), 2024-05-03
Supplement: Supplementary file [file essd-2024-138-AC1-supplement.pdf]

## 'No signs of cross-validation against independent data, probable overfitting'

The salinity dataset by Tao and co-authors is interpolating salinity profiles in the data-scarce Western Arctic Ocean with the help of an interpolated salinity database and auxiliary atmospheric and sea ice observations. As many as six different machine learning algorithms are used to merge the various data. The resulting data product is used to calculate freshwater contents and compared to in situ and model-based estimates.

The major weakness of the paper is the lack of consideration for the validation against independent data, both in the choice of data sources and then in the machine learning methodology. The authors use different data sources (WOD, EN4, UDASH and the WOA18 climatology) without indication of the inter-dependences between these datasets. Whether the CTD data has been included in EN4 or not has implications on how I am interpreting the results: is the product an improved interpolation method than the objective analysis used in EN4 or are the two predictions of CTD and EN4 values two independent estimates of the same salinities? The same question applies for the BGEP mooring data, are they included or not in the EN4, UDASH and WOA18 aggregators? This question is an important prerequisite to understand why the estimates differ so much in the results section. As the paper stands, these results are just numbers that could look right for the wrong reason.

**[About Cross-validation]** First of all, thank you for dedicating your valuable time and effort to conduct a thorough review. We supplement the K-fold cross-validation during the machine learning training process in the training pool. We used R2 to verify the ability of machine learning training (below). We selected RF, KNN, LGB, CB based on cross validation results, which is same as the original manuscript.

Table. Results (R2) of cross-validation of training pool.

|         | RF    |       | KNN   |       | LightGBM |       | Catboost |       | Multilinear Regression |       | Neural Network |       |
|---------|-------|-------|-------|-------|----------|-------|----------|-------|------------------------|-------|----------------|-------|
|         | CTD   | EN4   | CTD   | EN4   | CTD      | EN4   | CTD      | EN4   | CTD                    | EN4   | CTD            | EN4   |
| 2003    | 0.61  | 0.48  | 0.44  | 0.39  | 0.57     | 0.39  | 0.54     | 0.49  | 0.31                   | -0.55 | -0.21          | -0.21 |
| 2004    | 0.75  | 0.66  | 0.73  | 0.17  | 0.71     | 0.56  | 0.71     | 0.56  | -0.36                  | -0.38 | -0.14          | -0.14 |
| 2005    | 0.60  | 0.20  | 0.49  | 0.29  | 0.14     | -0.29 | 0.42     | -0.03 | -0.50                  | -0.39 | -0.24          | -0.24 |
| 2006    | 0.88  | 0.62  | 0.86  | 0.18  | 0.90     | 0.46  | 0.85     | 0.52  | 0.19                   | -0.24 | -0.36          | -0.36 |
| 2007    | 0.80  | 0.78  | 0.80  | 0.06  | 0.82     | 0.56  | 0.77     | 0.66  | 0.16                   | -0.40 | -0.44          | -0.44 |
| 2008    | 0.81  | -0.40 | 0.78  | -0.19 | 0.77     | -0.79 | 0.79     | 0.03  | 0.15                   | -1.21 | -1.04          | -1.04 |
| 2009    | 0.86  | 0.41  | 0.78  | -0.38 | 0.60     | 0.02  | 0.85     | 0.16  | 0.57                   | -0.41 | -0.34          | -0.34 |
| 2010    | 0.79  | 0.31  | 0.79  | -0.10 | 0.80     | -0.01 | 0.73     | 0.39  | 0.36                   | -0.52 | -0.37          | -0.37 |
| 2011    | 0.95  | 0.27  | 0.92  | 0.27  | 0.90     | 0.16  | 0.84     | 0.27  | 0.52                   | -0.21 | -0.67          | -0.67 |
| 2012    | 0.76  | 0.12  | 0.87  | 0.27  | 0.86     | -0.05 | 0.87     | 0.21  | 0.61                   | 0.03  | -0.33          | -0.33 |
| 2013    | 0.63  | 0.25  | -0.28 | -0.09 | 0.51     | 0.15  | 0.55     | 0.41  | -0.13                  | -0.27 | -0.27          | -0.27 |
| 2014    | -0.85 | 0.49  | -0.35 | 0.22  | -0.54    | 0.48  | -0.52    | 0.51  | -0.21                  | -0.18 | -0.41          | -0.41 |
| 2015    | -0.73 | 0.45  | -0.95 | -0.03 | -0.81    | 0.43  | -1.04    | 0.50  | -0.33                  | -0.39 | -0.49          | -0.49 |
| 2016    | -0.70 | 0.50  | -0.82 | -0.26 | -0.41    | 0.41  | -0.27    | 0.50  | -0.42                  | -2.08 | -0.67          | -0.67 |
| 2017    | -0.98 | 0.55  | -1.58 | 0.21  | -1.51    | 0.42  | -1.90    | 0.65  | -1.93                  | -0.63 | -0.15          | -0.15 |
| 2018    | -0.01 | 0.54  | -2.30 | 0.32  | -1.46    | 0.61  | 0.20     | 0.64  | -1.30                  | -0.06 | -0.24          | -0.24 |
| 2019    | -0.65 | 0.70  | -2.22 | 0.13  | -10.32   | 0.68  | -0.36    | 0.66  | -4.84                  | 0.04  | -0.36          | -0.36 |
| 2020    | 0.08  | 0.51  | -0.08 | 0.09  | -0.13    | 0.48  | -0.06    | 0.51  | -0.14                  | 0.10  | -0.17          | -0.17 |
| 2021    | 0.14  | 0.36  | -0.14 | 0.34  | -0.23    | 0.30  | -0.08    | 0.39  | -0.23                  | 0.08  | -0.20          | -0.20 |
| 2022    | 0.05  | 0.38  | -1.13 | 0.30  | -0.24    | 0.39  | -0.29    | 0.67  | -0.06                  | -0.01 | -0.27          | -0.27 |
| Average | 0.24  | 0.41  | -0.12 | 0.11  | -0.40    | 0.27  | 0.18     | 0.44  | -0.38                  | -0.38 | -0.37          | -0.37 |

The CTD data was utilized in this article, which includes the ITP data, LSSL data, WOD data and UDASH data. The spatial distribution of CTD data from these different sources exhibits some degree of overlap, yet notable disparities persist (refer to Figure 1). The salinity product of this paper is not an improved interpolation method than the objective analysis used in EN4. We utilized the scattered CTD data (see Figure1) alongside the gridded EN4 objective analysis results to generate two sets of predicted gridded data employing a post-filtered machine learning approach, subsequently merging these two sets into the ultimate salinity product.

The BGEP datasets utilized in this study primarily consist of LSSL CTD data for machine learning training and grid-based freshwater content data for validating the accuracy of salinity product calculations. The two sets of data are different. The LSSL CTD datasets (2003-2020) from BGEP, represented by purple dots, also show some degree of overlap; however, notable disparities persist when compared to UDASH (2003-2015) and WOD18 (2003-2020). Although EN4 and UDASH salinity datasets contains part BGEP LSSL CTD data, but they also contain other sources of data, is used to generate the salinity of the grid data of different methods.

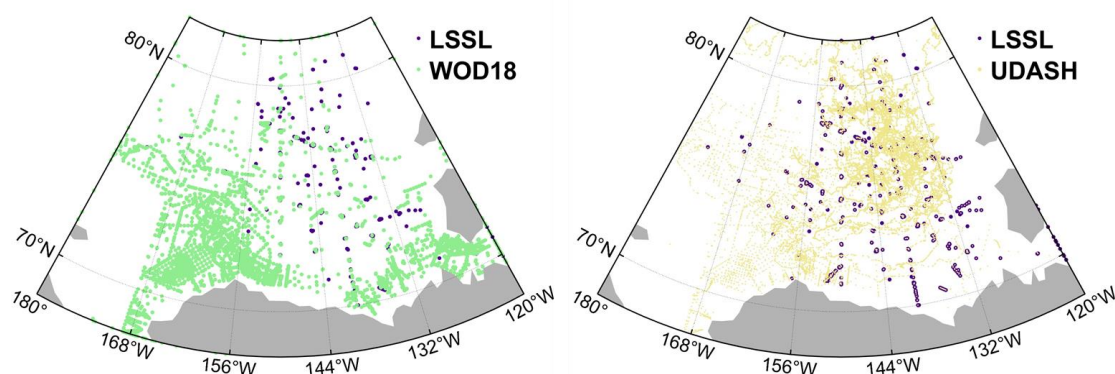

Dots indicate the locations of observational site from different sources.

BGEP freshwater content is the Estimation of liquid freshwater content (FWC) of the Beaufort Gyre region (BGR) are computed following Proshutinsky et al. (2009) using CTD, XCTD, and UCTD profiles collected each year. The FWC is calculated using optimal interpolation on a 50-km square grid between 70°N and 80°N, and 130°W - 170°W, and where water depths exceed 300 m. The salinity product can be compared with EN4, ORAS5, BGEP gridded freshwater.

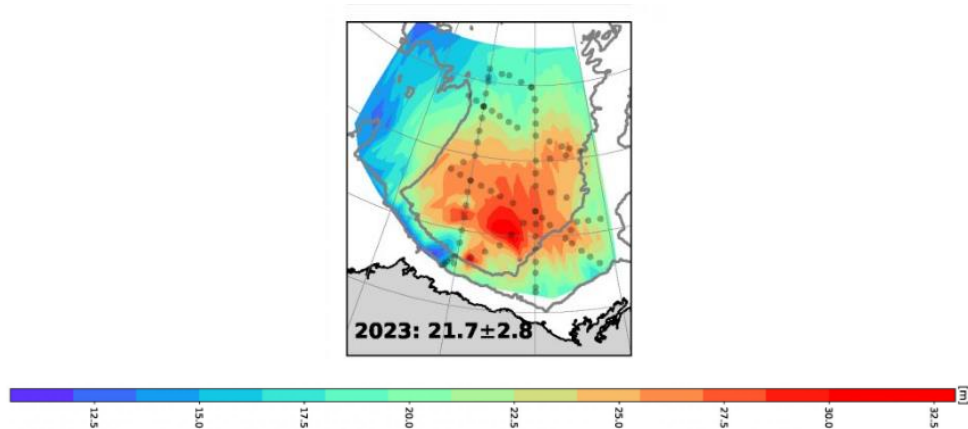

FWC in the BGR based on hydrographic measurements in 2003, The black dots indicate the locations of observational sites.(Figure from <https://www2.whoi.edu/site/beaufortgyre/data/freshwater-content-gridded-data/>)

The methodological concern is that all six machine learning techniques used will overfit the salinity data unless a part (say, one or two years) are set aside for validation. This is common practice in machine learning as all textbooks will show. From the text and the columns of zeroes in Table 1, the results are presented on the training data, which is therefore not guaranteeing any skills in extrapolation. Along the same lines, the uncertainty CT1 is computed from the residuals of the training datasets, which in the likely case of overfitting are much lower than the actual errors (and worse, unrelated to them). So if there were one additional CTD cast that was not included in the input dataset, I see no guarantee that the prediction in that point would be as skillful as indicated in the paper. I would prefer one properly validated algorithm to six different ways of overfitting.

**[About probable overfitting]** First of all, we thank the reviewer for your professional questions. Overfitting is indeed an emerging problem in machine learning. The problem of overfitting has been considered in the process of machine learning in this paper. The datasets used for prediction from each year were randomized, as depicted in Figure 4 of the text. Subsequently, 90% of the data was selected for training purposes, constituting the training pool, while the remaining 10% was allocated for testing purposes, forming the testing pool. After we control the overfitting, we firstly used threshold (0.25) of training(90%) pool to evaluate the prediction skill of different machine-learning methods, we selected four machine learning methods that prediction is closer to the training target of sea surface salinity (with the mean RMSE less than 0.25), which are RF, KNN, LGB, and CB. We added the verification results of testing pool (the table below), to get the same results. Therefore, the skills in extrapolation was guaranteed.

The predicted values of these different machine learning methods were the RMSE of the original and predicted values of the test pool (10%) controlled at a threshold of 0.25, and then

extrapolated to the predicted values of the production grid after confirming the reliability of the machine learning method. (line274-278). CT1 is our respectively based on EN4 data to a variety of machine learning and CTD data screening for the error of the predicted results of the first merging (figure 6 a,b). The predicted values of these different machine learning methods were the RMSE of the original and predicted values of the test pool (10%) controlled at a threshold of 0.25, and then extrapolated to the predicted values of the production grid after confirming the reliability of the machine learning method. The constraint of CT1 comprises two components, namely the merging uncertainty associated with multiple machine learning predictions for CTD data and the merging uncertainty related to multiple machine learning predictions for EN4 data. However, typically, the predictive value merging process of CTD data tends to generate a higher level of uncertainty. In practical operations, our focus lies in controlling the predictive value merging uncertainty of CTD to be lower than that of CT1.

|                  | RF          |      | KNN         |      | LightGBM    |      | Catboost    |      | Multilinear Regression |      | Neural Network |      |
|------------------|-------------|------|-------------|------|-------------|------|-------------|------|------------------------|------|----------------|------|
|                  | CTD         | EN4  | CTD         | EN4  | CTD         | EN4  | CTD         | EN4  | CTD                    | EN4  | CTD            | EN4  |
| <b>2003</b>      | 0.42        | 0.05 | 0.34        | 0.00 | 0.34        | 0.00 | 0.32        | 0.00 | 1.07                   | 1.00 | 1.00           | 2.01 |
| <b>2004</b>      | 0.21        | 0.05 | 0.14        | 0.00 | 0.16        | 0.01 | 0.16        | 0.00 | 0.92                   | 1.03 | 0.73           | 2.59 |
| <b>2005</b>      | 0.14        | 0.11 | 0.12        | 0.00 | 0.13        | 0.01 | 0.13        | 0.00 | 0.65                   | 1.07 | 0.40           | 2.03 |
| <b>2006</b>      | 0.10        | 0.07 | 0.11        | 0.00 | 0.12        | 0.00 | 0.12        | 0.00 | 0.69                   | 1.00 | 0.45           | 3.11 |
| <b>2007</b>      | 0.21        | 0.05 | 0.14        | 0.00 | 0.20        | 0.01 | 0.20        | 0.00 | 1.11                   | 1.21 | 0.91           | 3.54 |
| <b>2008</b>      | 0.21        | 0.05 | 0.23        | 0.00 | 0.23        | 0.00 | 0.23        | 0.00 | 1.20                   | 1.12 | 0.81           | 1.66 |
| <b>2009</b>      | 0.11        | 0.05 | 0.14        | 0.00 | 0.11        | 0.00 | 0.12        | 0.00 | 0.81                   | 1.01 | 0.51           | 2.03 |
| <b>2010</b>      | 0.21        | 0.11 | 0.23        | 0.00 | 0.22        | 0.01 | 0.22        | 0.00 | 0.94                   | 1.20 | 0.59           | 2.94 |
| <b>2011</b>      | 0.18        | 0.07 | 0.18        | 0.00 | 0.19        | 0.00 | 0.17        | 0.00 | 0.99                   | 1.03 | 0.66           | 1.74 |
| <b>2012</b>      | 0.25        | 0.11 | 0.26        | 0.00 | 0.24        | 0.00 | 0.25        | 0.00 | 0.70                   | 1.02 | 0.61           | 2.92 |
| <b>2013</b>      | 0.18        | 0.08 | 0.17        | 0.00 | 0.18        | 0.00 | 0.18        | 0.00 | 0.72                   | 0.99 | 0.44           | 2.49 |
| <b>2014</b>      | 0.16        | 0.06 | 0.16        | 0.00 | 0.15        | 0.01 | 0.15        | 0.00 | 0.43                   | 1.08 | 0.36           | 2.51 |
| <b>2015</b>      | 0.23        | 0.07 | 0.17        | 0.00 | 0.27        | 0.00 | 0.21        | 0.00 | 0.71                   | 0.97 | 0.66           | 1.96 |
| <b>2016</b>      | 0.08        | 0.05 | 0.02        | 0.00 | 0.03        | 0.00 | 0.02        | 0.00 | 0.39                   | 1.09 | 0.46           | 2.12 |
| <b>2017</b>      | 0.11        | 0.05 | 0.03        | 0.00 | 0.04        | 0.00 | 0.02        | 0.00 | 0.53                   | 1.00 | 0.46           | 2.87 |
| <b>2018</b>      | 0.12        | 0.06 | 0.13        | 0.00 | 0.15        | 0.00 | 0.13        | 0.00 | 0.58                   | 0.99 | 0.33           | 1.76 |
| <b>2019</b>      | 0.33        | 0.05 | 0.25        | 0.00 | 0.50        | 0.00 | 0.22        | 0.00 | 0.82                   | 0.96 | 0.77           | 1.92 |
| <b>2020</b>      | 1.19        | 0.05 | 0.83        | 0.00 | 1.19        | 0.00 | 1.19        | 0.00 | 1.67                   | 1.07 | 1.66           | 3.81 |
| <b>2021</b>      | 0.69        | 0.07 | 0.69        | 0.00 | 0.69        | 0.00 | 0.69        | 0.00 | 1.54                   | 0.88 | 1.80           | 2.57 |
| <b>2022</b>      | 0.20        | 0.06 | 0.21        | 0.00 | 0.20        | 0.01 | 0.21        | 0.00 | 0.78                   | 1.06 | 0.60           | 2.90 |
| <b>Average</b>   | 0.27        | 0.07 | 0.23        | 0.00 | 0.27        | 0.00 | 0.25        | 0.00 | 0.86                   | 1.04 | 0.71           | 2.47 |
| <b>mean RMSE</b> | <b>0.17</b> |      | <b>0.11</b> |      | <b>0.14</b> |      | <b>0.12</b> |      | <b>0.95</b>            |      | <b>1.59</b>    |      |

Overall the text is missing a clear explanation of the algorithm used and I had to squint at Figure 2 to imagine the methodology. The paper contains a lot of information, which relevance for the dataset is not mentioned. It overall makes a very tedious read and I realize that the correct procedures may have been applied without me finding it mentioned in the text.

In view of the above weaknesses, I believe the submitted manuscript cannot easily be modified into a publishable version. All the results should be presented on validation data rather than training data, and all the methods and data sections should be completely rewritten to specify the intended use of the data.

The results section should be rewritten to reflect on the reasons for the differences between EN4 and BGEF data and why the author's approach is the correct answer to the problem.

The expression of our idea in Figure 2 may not be ideal. Thank you for reminding us. We have redrawn Figure 2. The methods and data sections have been rewritten.

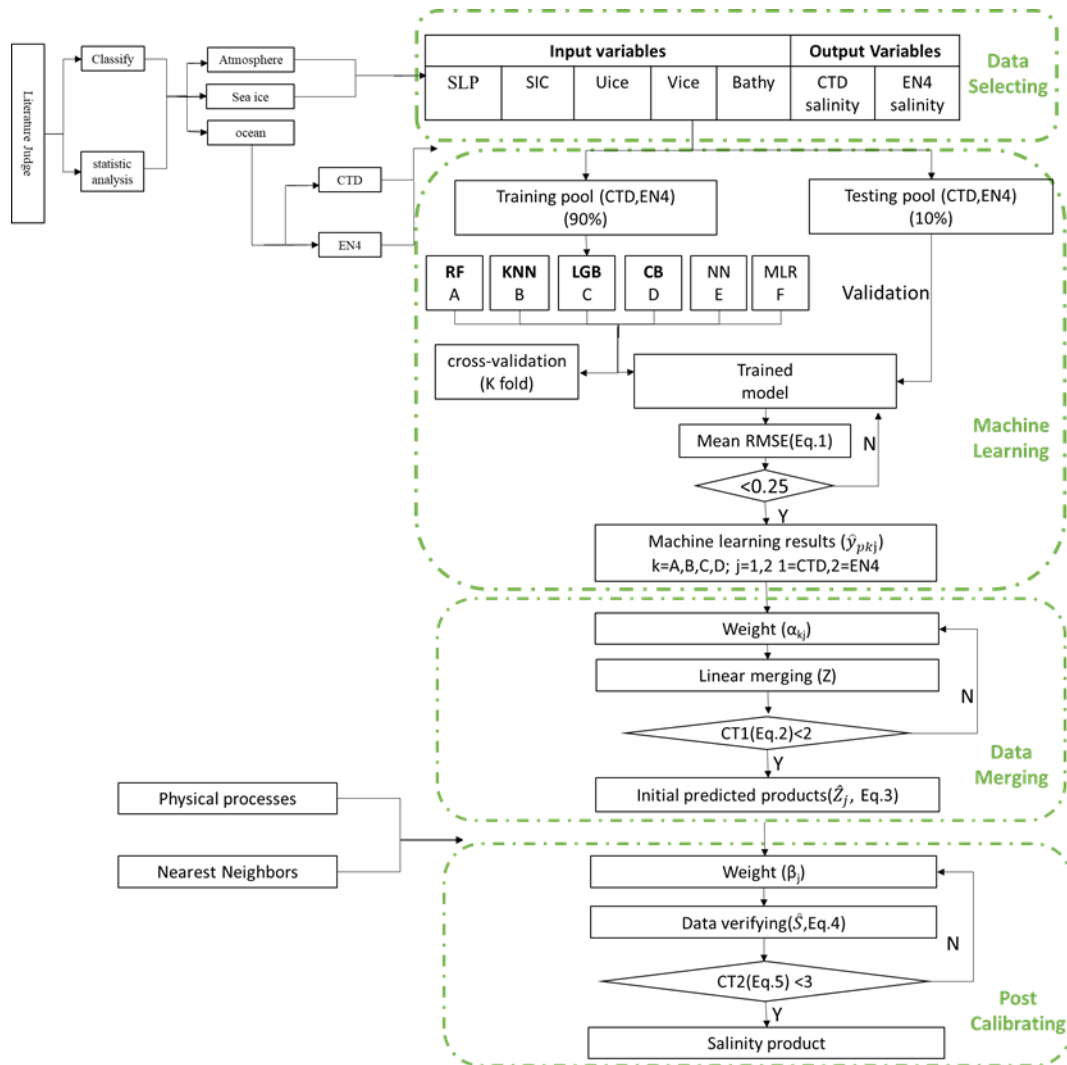

Figure 2 Procedure for improving the salinity field in the Western Arctic Ocean through a data mining-based machine learning method.

The results presented by training data are shown in Figure 5 and Table 1. We added the verification results of testing pool (validation data) in the above table which indicate the similar result of Table 1 in the manuscript. Thanks to your reminder, Table 1, which was based on training data, has now been replaced with results based on the test pool (validation data). At the same time, Figure 5 is the result of all the data (training data + testing(validation) data), we here supplement the statistical results based on the testing data in the table below. In

addition, all other results in the original manuscript are based on validation data and extrapolations after validation.

Table. MAE between the predicted salinity and target salinity of four selected machine learning methods in the testing pool

|                | RF   |      | KNN  |      | LightGBM |      | Catboost |      |
|----------------|------|------|------|------|----------|------|----------|------|
|                | CTD  | EN4  | CTD  | EN4  | CTD      | EN4  | CTD      | EN4  |
| <b>2003</b>    | 0.22 | 0.03 | 0.12 | 0.00 | 0.14     | 0.00 | 0.13     | 0.00 |
| <b>2004</b>    | 0.12 | 0.03 | 0.07 | 0.00 | 0.07     | 0.00 | 0.07     | 0.00 |
| <b>2005</b>    | 0.05 | 0.04 | 0.03 | 0.00 | 0.04     | 0.00 | 0.04     | 0.00 |
| <b>2006</b>    | 0.05 | 0.03 | 0.05 | 0.00 | 0.06     | 0.00 | 0.06     | 0.00 |
| <b>2007</b>    | 0.07 | 0.03 | 0.06 | 0.00 | 0.06     | 0.00 | 0.06     | 0.00 |
| <b>2008</b>    | 0.09 | 0.03 | 0.07 | 0.00 | 0.09     | 0.00 | 0.10     | 0.00 |
| <b>2009</b>    | 0.05 | 0.03 | 0.05 | 0.00 | 0.06     | 0.00 | 0.05     | 0.00 |
| <b>2010</b>    | 0.09 | 0.05 | 0.08 | 0.00 | 0.09     | 0.00 | 0.09     | 0.00 |
| <b>2011</b>    | 0.09 | 0.04 | 0.07 | 0.00 | 0.09     | 0.00 | 0.08     | 0.00 |
| <b>2012</b>    | 0.10 | 0.05 | 0.09 | 0.00 | 0.10     | 0.00 | 0.10     | 0.00 |
| <b>2013</b>    | 0.07 | 0.03 | 0.06 | 0.00 | 0.06     | 0.00 | 0.06     | 0.00 |
| <b>2014</b>    | 0.05 | 0.03 | 0.04 | 0.00 | 0.04     | 0.00 | 0.04     | 0.00 |
| <b>2015</b>    | 0.09 | 0.03 | 0.04 | 0.00 | 0.08     | 0.00 | 0.06     | 0.00 |
| <b>2016</b>    | 0.04 | 0.03 | 0.00 | 0.00 | 0.01     | 0.00 | 0.01     | 0.00 |
| <b>2017</b>    | 0.06 | 0.03 | 0.01 | 0.00 | 0.02     | 0.00 | 0.01     | 0.00 |
| <b>2018</b>    | 0.04 | 0.02 | 0.03 | 0.00 | 0.04     | 0.00 | 0.03     | 0.00 |
| <b>2019</b>    | 0.11 | 0.03 | 0.07 | 0.00 | 0.11     | 0.00 | 0.07     | 0.00 |
| <b>2020</b>    | 0.20 | 0.03 | 0.14 | 0.00 | 0.18     | 0.00 | 0.17     | 0.00 |
| <b>2021</b>    | 0.11 | 0.04 | 0.06 | 0.00 | 0.08     | 0.00 | 0.08     | 0.00 |
| <b>2022</b>    | 0.07 | 0.02 | 0.06 | 0.00 | 0.07     | 0.00 | 0.07     | 0.00 |
| <b>Average</b> | 0.09 | 0.03 | 0.06 | 0.00 | 0.08     | 0.00 | 0.07     | 0.00 |

What you mentioned that “the reasons for the differences between EN4 and BGEP data and why our approach is the correct answer to the problem” is not our main concern, but we have tried to supplement the discussion in this regard.

The high freshwater content provided by BGEP may be due to the fact that BGEP mainly uses summer (July-October) salinity data to calculate the freshwater content. Previous studies often used the freshwater content of BGEP to characterize the real freshwater content in the Beaufort Gyre Region (Proshutinsky et al.,2018; Zhang et al.,2021; Lin et al, 2023). Therefore, our salinity products only need to be closer to the freshwater content of BGEP than other data, which means that our salinity data is more accurate.

We used machine learning to reconstruct salinity based on the EN4. The results of the proposed comparison between optimal interpolation and machine learning methods are appended below. Compared with traditional methods, the machine learning method has the advantage of more accurate reconstruction of salinity. The MAE of EN4 salinity reconstruction by machine learning method (0.04psu) is significantly smaller than that by traditional method (0.09psu).

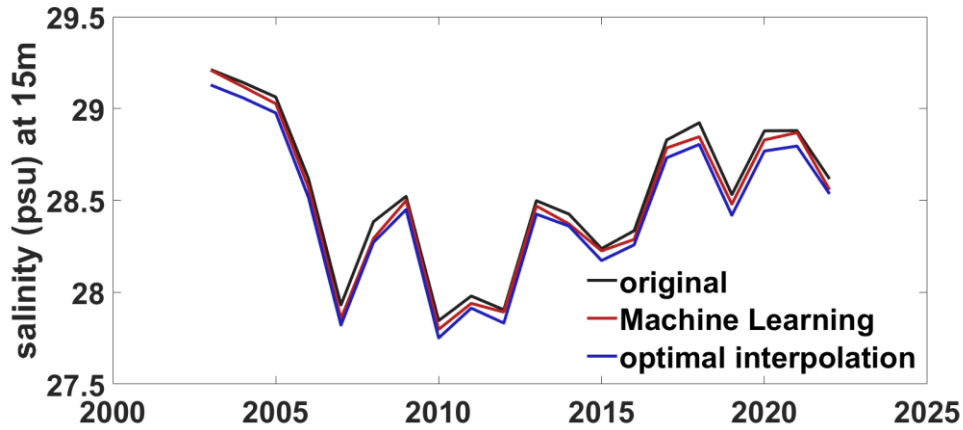

The mean salinity at 15m in the BG region based on EN4 (defined as BG box, Proshutinsky et al., 2009: 170°W-130°W, 70.5°N-80.5°N)

We incorporated optimal interpolation for reconstructing the CTD salinity, achieving an MAE of 0.73 psu. This value is slightly larger than the absolute error of 0.52 psu obtained from the machine learning.

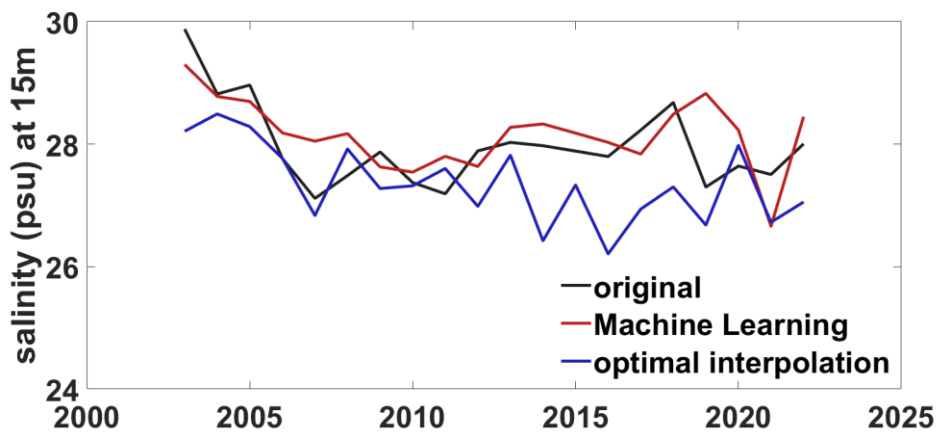

The mean salinity at 15m in the BG region based on CTD (defined as BG box, Proshutinsky et al., 2009: 170°W-130°W, 70.5°N-80.5°N)
